# Supplementary material
Source: publisher site journal article supplement (https://www.dovepress.com/article/286044)
Supplement: Supplementary file 1 [file get_supplementary_file.php]

**Supplementary Material**

***Supplement 1: Standardized Data Collection Sheet***

Names of non-participant observers: ______________________________________________

Date of observation: ___________

| **Characteristics of the Multi-Disciplinary Team** | | | |
| --- | --- | --- | --- |
| Tumor board: _______________ | Total number of Part.: ___ | Number of cases discussed: ___ | Total duration of meeting: ___ Min. | |
| **Participants: chair and disciplines represented – information to be taken from tumor board letter afterwards.** | | | |
| Notes on participants and condition for teamwork: (e.g., chair, medical oncologist, oncological surgeon, radiotherapist, pathologist, nurse, GP) | | | |

| **Characteristics of Case Discussion** | | | | | | | | |
| --- | --- | --- | --- | --- | --- | --- | --- | --- |
| **Code** | **Chair involvement/ number of participants involved in discussion/ total duration of case** | **Case-manager** | **Non-medical info** | **Treatment options discussed** | **Treatment decision/**  **trial participation discussed** | **Potentially useful for interview** | **Comments:**  **(e.g., on non-medical info discussed: mental health, socio-economic status, personal circumstances, treatment preferences, openness about uncertainty)** |
|  | Chair involved:  □yes □no  No. of participants in discussion: _________  Case duration: _______ min. | □pre  □abs | □yes  □ no | □1 □>1  □ pat. pref. considered  □ not relevant | □actual debate  □ monologue  Trial:  □yes □no | □yes  □no |  |

***Supplement 2: Interview Guide***

**Introduction to the Participant (2 minutes)**

Thank you for your time and willingness to participate in this interview. I am an honors/Ph.D. student from [name hospital].

Our research question is: *What are the experiences of [name hospital] tumor board clinicians with patient-centredness in complex decision-making in tumor boards? Do they feel a need for improvement? How can the level of patient-centredness be enhanced?*

The interview will take 30–45 minutes and consists of general and specific questions about your experiences and views. We would like to ask you to share everything that comes to your mind: there is no right or wrong answer. We want to learn from you as an expert.

Everything that you say during this interview is treated with confidentiality, and we will anonymize any statement made. Therefore, none of us should mention your name or any patient’s name during the audiotaping.

Do you have any questions before we start? Are you okay with me starting the audiotape?

*Start audiotape* I have now started the audiotape, as you agreed to be interviewed.

**Opening Question (warm-up 3 minutes)**

First, please tell me what **your** role is on the tumor board.

**Key Questions (15–30 minutes)**

How do **you** experience the current level of patient-centeredness on your tumor board?

- Can you give an illustration of patient-centeredness within your tumor board?
- What is your opinion on patient-centredness?

*STIMULUS show pre-selected case from observations*

What was your experience of patient-centeredness in this case?

Do **you** feel a need to improve the level of patient-centeredness in your tumor board?

- If not, how do you think patient-centredness is implemented otherwise for your patients?

Do you have an idea for a strategy that would work for **you** to make the tumor board meetings more patient-centered?

*STIMULUS Show best practices list*

**Ending Question (5 minutes)**

We wanted to discuss patient-centredness during tumor board discussions. Is there anything we missed?

- Do you want to add something we did not pay attention to today?

**Probing strategies and questions**

- … nodding … (use silence)
- Paraphrasing: repeat the last phrase in a questioning way
- Can you tell me more about … your experience/wish/expectation?
- What do you mean, can you give an example?
- What conditions or situations, in your experience, influence this?
- What does patient-centeredness mean to you?
- How do you experience the general attitude towards patient-centeredness?
- What have you already done to improve patient-centeredness?
- How do you translate MDT advice to the consult with the patient?
- What kind of information or method or … would have helped to improve the quality of decision making?

***Supplement 3: List of Strategies***

Strategies were categorized according to their relation with the MDT meeting in time: before, during, and after the meeting.

Theme A: Generic [1]

Improve sensitivity to patient’s preferences

- Train the entire tumor board on Shared Decision-Making.
- Train chair to ensure patient-centeredness and engage staff closest to the patient.
- Improve organizational management to ensure staff members can attend meetings.

Theme B: Before MDT meeting [2, 3, 4, research team, Citrienfonds (a Dutch research fund)]

- Collect non-medical patient data.
- Find out about patient values with standardized tools.
- Delegate the task of finding out about patient preferences to GP.

Theme C: During MDT meeting [1, 5, 6, 7, 8, research team, personal communication local quality employee]

- Show additional information on screen.
- Section for anesthetics, including info on the patient’s fitness for treatment.
- Non-medical information and a portrait of the patient.
- Enhance decision-making behavior of clinicians
- Use systematic speaking order to reduce intimidation of non-physicians.
- Close each case by repeating the recommendation and underlying reasoning; otherwise record disagreement.
- Do not aim for consensus in complex cases: list >1 treatment option to be discussed with the patient.
- Prescribe patient decision aid in complex cases.

Invite patient representative to the tumor board meeting

- A patient “advocate”, e.g., GP or nurse.
- Patient attends meeting him- or herself.

Theme D: After MDT meeting [6]

- Discuss recorded disagreement during the tumor board meeting with the patient.

**References**

1. Lamb B.W., Brown K.F., Nagpal K., Vincent, C., Green, J.S. & Sevdalis, N. (2011) Quality of care management decisions by multidisciplinary cancer teams: a systematic review. *Annals of Surgical Oncology*;18(8):2116–25. <https://doi.org/10.1245/s10434-011-1675-6>
2. Epstein R.M., Duberstein P.R., Fenton J.J., Fiscella, K., Hoerger, M., Tancredi, D.J., … Kravitz, R.L. (2017). Effect of a patient-centered communication intervention on oncologist-patient communication, quality of life, and health care utilization in advanced cancer: the VOICE randomized clinical trial. *JAMA Oncol*ogy;3(1):92–100. https://doi.org/10.1001/jamaoncol.2016.4373
3. 32. Fried T.R., Tinetti M., Agostini J., Iannone, L. & Towle, V. (2011). Health outcome prioritization to elicit preferences of older persons with multiple health conditions. *Patient Education and Counselling*;83(2):278–82. https://doi.org/10.1016/j.pec.2010.04.032
4. Schuling J., Sytsema R., & Berendsen A.J. (2013). Aanpassen medicatie: voorkeur oudere patient telt mee. *Nederlands tijdschrift voor geneeskunde*;157(A6491):1–5. Retrieved from: <https://www.ntvg.nl/artikelen/aanpassen-medicatie-voorkeur-oudere-patiënt-telt-mee>
5. English R., Metcalfe C., Day J., Rayter, Z. &Blazeby, J.M. (2012). A prospective analysis of implementation of multi-disciplinary team decisions in breast cancer. The *Breast Journal*;18(5):459–63. <https://doi.org/10.1111/j.1524-4741.2012.01270.x>
6. Lamb B.W., Taylor C., Lamb J.N., Strickland, S.L., Vincent, C., Green, J.S. & Sevdalis, N. (2013). Facilitators and barriers to teamworking and patient centeredness in multidisciplinary cancer teams: findings of a national study. *Annals of Surgical Oncology*;20(5):1408–16. https://doi.org/10.1245/s10434-012-2676-9
7. 26. Jalil R., Ahmed M., Green J.S. & Sevdalis, N. (2013). Factors that can make an impact on decision-making and decision implementation in cancer multidisciplinary teams: an interview study of the provider perspective. *International Journal of Surgery*;11(5):389–94. <https://doi.org/10.1016/j.ijsu.2013.02.026>
8. Savelberg W., van der Weijden T., Boersma L., Smidt, M., Willekens, C. & Moser, A. (2017). Developing a patient decision aid for the treatment of women with early stage breast cancer: the struggle between simplicity and complexity. *BMC Medical Informatics and Decision Making*;17(1):112. <https://doi.org/10.1186/s12911-017-0505-6>
